# Supplementary material
Source: PubMed Central journal article supplement (PMC6813854)
Supplement: NIHMS1028298-supplement-4.pdf [file NIHMS1028298-supplement-4.pdf]

## Early 1<sup>st</sup> instar larvae: 2-fold downregulated

| <b>Biological Processes GO Term</b>             | <b>Fold Enrichment</b> | <b>p-value</b> |
|-------------------------------------------------|------------------------|----------------|
| GO:0032367~intracellular cholesterol transport  | 18.7565032             | 8.88E-04       |
| GO:0015918~sterol transport                     | 14.58839138            | 0.0020         |
| GO:0006013~mannose metabolic process            | 14.58839138            | 0.0020         |
| GO:0006020~inositol metabolic process           | 14.0673774             | 0.0174         |
| GO:0006807~nitrogen compound metabolic process  | 12.30895522            | 8.32E-05       |
| GO:0046855~inositol phosphate dephosphorylation | 10.94129353            | 0.0288         |
| GO:0006517~protein deglycosylation              | 9.378251599            | 0.0079         |
| GO:0043171~peptide catabolic process            | 9.054863613            | 1.96E-05       |
| GO:0006261~DNA-dependent DNA replication        | 8.205970149            | 0.0116         |
| GO:0006400~tRNA modification                    | 8.205970149            | 0.0497         |
| GO:0006270~DNA replication initiation           | 7.459972863            | 0.0040         |
| GO:0046701~insecticide catabolic process        | 7.135626217            | 0.0047         |
| GO:0042023~DNA endoreduplication                | 6.910290652            | 0.0188         |
| GO:0046680~response to DDT                      | 5.861407249            | 0.0096         |
| GO:0070050~neuron cellular homeostasis          | 5.251820896            | 0.0390         |
| GO:0006260~DNA replication                      | 5.148844015            | 8.21E-04       |
| GO:0016311~dephosphorylation                    | 4.304771226            | 0.0024         |
| GO:0005975~carbohydrate metabolic process       | 3.40625176             | 0.0014         |
| GO:0040003~chitin-based cuticle development     | 3.30303201             | 9.78E-05       |
| GO:0006508~proteolysis                          | 3.1787337              | 7.57E-12       |
| GO:0055114~oxidation-reduction process          | 3.027445298            | 2.88E-09       |
| GO:0055085~transmembrane transport              | 2.829644879            | 8.22E-06       |
| GO:0008152~metabolic process                    | 2.248211               | 0.0340         |

## Early 1<sup>st</sup> instar larvae: 2-fold upregulated

| <b>Biological Processes GO Term</b>                      | <b>Fold Enrichment</b> | <b>p-value</b> |
|----------------------------------------------------------|------------------------|----------------|
| GO:0030259~lipid glycosylation                           | 43.12156863            | 0.0457         |
| GO:0043487~regulation of RNA stability                   | 43.12156863            | 0.0457         |
| GO:0022404~molting cycle process                         | 30.80112045            | 9.21E-06       |
| GO:0003383~apical constriction                           | 27.44099822            | 6.01E-08       |
| GO:0032053~ciliary basal body organization               | 25.87294118            | 0.0051         |
| GO:0016476~regulation of embryonic cell shape            | 15.09254902            | 4.23E-06       |
| GO:0042335~cuticle development                           | 14.37385621            | 3.10E-04       |
| GO:0061723~glycophagy                                    | 11.76042781            | 0.0255         |
| GO:0007160~cell-matrix adhesion                          | 10.78039216            | 0.0055         |
| GO:0016236~macroautophagy                                | 9.240336134            | 0.0402         |
| GO:0007472~wing disc morphogenesis                       | 8.624313725            | 0.0104         |
| GO:0044719~regulation of imaginal disc-derived wing size | 7.186928105            | 0.0172         |
| GO:0035096~larval midgut cell programmed cell death      | 6.634087481            | 0.0214         |
| GO:0045214~sarcomere organization                        | 5.749542484            | 0.0312         |
| GO:0010506~regulation of autophagy                       | 5.673890609            | 0.0111         |
| GO:0008063~Toll signaling pathway                        | 4.928179272            | 0.0463         |
| GO:0050830~defense response to Gram-positive bacterium   | 4.620168067            | 0.0093         |
| GO:0006914~autophagy                                     | 4.068072512            | 0.0337         |
| GO:0007608~sensory perception of smell                   | 3.544238517            | 0.0266         |
| GO:0007015~actin filament organization                   | 3.080112045            | 0.0447         |
| GO:0005975~carbohydrate metabolic process                | 2.847650758            | 0.0360         |
| GO:0055114~oxidation-reduction process                   | 2.09328003             | 0.0033         |
| GO:0006508~proteolysis                                   | 1.906427245            | 0.0071         |

**Late 1<sup>st</sup> instar larvae: 2-fold downregulated**

| <b>Biological Processes GO Term</b>                               | <b>Fold Enrichment</b> | <b>p-value</b> |
|-------------------------------------------------------------------|------------------------|----------------|
| GO:0051923~sulfation                                              | 16.86503067            | 0.0111         |
| GO:0009913~epidermal cell differentiation                         | 14.99113838            | 0.0016         |
| GO:0006805~xenobiotic metabolic process                           | 13.49202454            | 0.0180         |
| GO:0003383~apical constriction                                    | 12.26547685            | 6.24E-05       |
| GO:0010171~body morphogenesis                                     | 11.77875158            | 6.14E-09       |
| GO:0006035~cuticle chitin biosynthetic process                    | 11.24335378            | 0.0262         |
| GO:0006031~chitin biosynthetic process                            | 11.24335378            | 0.0262         |
| GO:0008299~isoprenoid biosynthetic process                        | 10.22123071            | 9.85E-04       |
| GO:0006032~chitin catabolic process                               | 9.894151329            | 4.85E-08       |
| GO:0010025~wax biosynthetic process                               | 9.83793456             | 4.05E-05       |
| GO:0035336~long-chain fatty-acyl-CoA metabolic process            | 9.83793456             | 4.05E-05       |
| GO:0030497~fatty acid elongation                                  | 9.199107641            | 2.62E-06       |
| GO:0042759~long-chain fatty acid biosynthetic process             | 8.432515337            | 0.0461         |
| GO:0045455~ecdysteroid metabolic process                          | 8.17698457             | 0.0110         |
| GO:0040003~chitin-based cuticle development                       | 8.061272524            | 4.88E-36       |
| GO:0006807~nitrogen compound metabolic process                    | 7.027096115            | 0.0046         |
| GO:0046701~insecticide catabolic process                          | 6.843780564            | 3.92E-04       |
| GO:0016476~regulation of embryonic cell shape                     | 6.74601227             | 0.0015         |
| GO:0006030~chitin metabolic process                               | 5.905599967            | 7.04E-13       |
| GO:0046680~response to DDT                                        | 5.621676892            | 0.0012         |
| GO:0035025~positive regulation of Rho protein signal transduction | 5.621676892            | 0.0316         |
| GO:0007160~cell-matrix adhesion                                   | 5.621676892            | 0.0316         |
| GO:0018990~ecdysis, chitin-based cuticle                          | 5.353977992            | 0.0126         |
| GO:0035017~cuticle pattern formation                              | 5.290990016            | 0.0372         |
| GO:0051017~actin filament bundle assembly                         | 5.290990016            | 0.0372         |
| GO:0007158~neuron cell-cell adhesion                              | 4.91896728             | 0.0025         |
| GO:0005975~carbohydrate metabolic process                         | 4.667052514            | 6.04E-09       |
| GO:0050804~modulation of synaptic transmission                    | 4.036075717            | 0.0069         |
| GO:0016042~lipid catabolic process                                | 3.818497511            | 0.0022         |
| GO:0007416~synapse assembly                                       | 3.818497511            | 0.0022         |
| GO:0006749~glutathione metabolic process                          | 3.349084106            | 0.0170         |
| GO:0016311~dephosphorylation                                      | 3.317710952            | 0.0053         |
| GO:0006810~transport                                              | 2.984961181            | 4.62E-04       |
| GO:0055114~oxidation-reduction process                            | 2.674389978            | 6.69E-10       |
| GO:0007480~imaginal disc-derived leg morphogenesis                | 2.623449216            | 0.0492         |
| GO:0006629~lipid metabolic process                                | 2.529754601            | 0.0251         |
| GO:0006508~proteolysis                                            | 2.130319664            | 2.68E-06       |

### Late 1<sup>st</sup> instar larvae: 2-fold upregulated

| <b>Biological Processes GO Term</b>                                         | <b>Fold Enrichment</b> | <b>p-value</b> |
|-----------------------------------------------------------------------------|------------------------|----------------|
| GO:0007202~activation of phospholipase C activity                           | 43.984                 | 0.045          |
| GO:0051290~protein heterotetramerization                                    | 43.984                 | 0.045          |
| GO:0048791~calcium ion-regulated exocytosis of neurotransmitter             | 16.494                 | 0.0131         |
| GO:0009790~embryo development                                               | 9.425142857            | 0.0389         |
| GO:0010171~body morphogenesis                                               | 8.377904762            | 0.0113         |
| GO:0006749~glutathione metabolic process                                    | 7.486638298            | 8.14E-05       |
| GO:0006959~humoral immune response                                          | 7.330666667            | 0.0163         |
| GO:0007169~transmembrane receptor protein tyrosine kinase signaling pathway | 7.03744                | 0.0183         |
| GO:0070050~neuron cellular homeostasis                                      | 7.03744                | 0.0183         |
| GO:0050830~defense response to Gram-positive bacterium                      | 5.498                  | 0.0016         |
| GO:0007474~imaginal disc-derived wing vein specification                    | 4.149433962            | 0.0316         |
| GO:0007606~sensory perception of chemical stimulus                          | 3.824695652            | 0.0048         |
| GO:0040003~chitin-based cuticle development                                 | 3.596176101            | 2.62E-04       |
| GO:0050829~defense response to Gram-negative bacterium                      | 2.850814815            | 0.0359         |
| GO:0055085~transmembrane transport                                          | 2.426703448            | 0.00250        |
| GO:0007165~signal transduction                                              | 2.328564706            | 0.0395         |

## Early 2<sup>nd</sup> instar larvae: 2-fold downregulated

| <b>Biological Processes GO Term</b>                               | <b>Fold Enrichment</b> | <b>p-value</b> |
|-------------------------------------------------------------------|------------------------|----------------|
| GO:0008608~attachment of spindle microtubules to kinetochore      | 9.140482128            | 0.0048         |
| GO:0035561~regulation of chromatin binding                        | 9.140482128            | 0.0332         |
| GO:0055129~L-proline biosynthetic process                         | 9.140482128            | 0.0332         |
| GO:0006567~threonine catabolic process                            | 9.140482128            | 0.0332         |
| GO:0006551~leucine metabolic process                              | 9.140482128            | 0.0332         |
| GO:0006613~cotranslational protein targeting to membrane          | 9.140482128            | 0.0332         |
| GO:0032367~intracellular cholesterol transport                    | 7.834698967            | 2.69E-04       |
| GO:0009913~epidermal cell differentiation                         | 7.61706844             | 0.0018         |
| GO:0010884~positive regulation of lipid storage                   | 7.312385702            | 0.0110         |
| GO:0015918~sterol transport                                       | 7.109263877            | 1.06E-04       |
| GO:0022404~molting cycle process                                  | 6.528915806            | 0.0038         |
| GO:0033539~fatty acid beta-oxidation using acyl-CoA dehydrogenase | 6.093654752            | 5.87E-06       |
| GO:0006013~mannose metabolic process                              | 6.093654752            | 0.0013         |
| GO:0003383~apical constriction                                    | 5.816670445            | 4.79E-04       |
| GO:0006807~nitrogen compound metabolic process                    | 5.71280133             | 1.21E-05       |
| GO:0006270~DNA replication initiation                             | 5.401193985            | 6.27E-07       |
| GO:0006517~protein deglycosylation                                | 5.223132645            | 3.14E-04       |
| GO:0002027~regulation of heart rate                               | 5.223132645            | 0.0325         |
| GO:0000086~G2/M transition of mitotic cell cycle                  | 5.078045627            | 0.0114         |
| GO:0006635~fatty acid beta-oxidation                              | 5.043024622            | 6.13E-08       |
| GO:0009813~flavonoid biosynthetic process                         | 4.839078774            | 1.55E-08       |
| GO:0052696~flavonoid glucuronidation                              | 4.839078774            | 1.55E-08       |
| GO:0046701~insecticide catabolic process                          | 4.768947197            | 9.89E-06       |
| GO:0006631~fatty acid metabolic process                           | 4.570241064            | 0.0174         |
| GO:0045455~ecdysteroid metabolic process                          | 4.154764604            | 0.0250         |
| GO:0043171~peptide catabolic process                              | 4.097457506            | 2.42E-05       |
| GO:0035336~long-chain fatty-acyl-CoA metabolic process            | 3.998960931            | 0.0051         |
| GO:0006261~DNA-dependent DNA replication                          | 3.998960931            | 0.0051         |
| GO:0010025~wax biosynthetic process                               | 3.998960931            | 0.0051         |
| GO:0046680~response to DDT                                        | 3.917349483            | 9.37E-05       |
| GO:0055088~lipid homeostasis                                      | 3.833105409            | 5.35E-05       |
| GO:0042381~hemolymph coagulation                                  | 3.80853422             | 0.0343         |
| GO:0048800~antennal morphogenesis                                 | 3.656192851            | 0.0182         |
| GO:0042335~cuticle development                                    | 3.656192851            | 0.0182         |
| GO:0006820~anion transport                                        | 3.590903693            | 4.84E-04       |
| GO:0008363~larval chitin-based cuticle development                | 3.427680798            | 0.0242         |
| GO:0035017~cuticle pattern formation                              | 3.226052516            | 0.0312         |
| GO:0007031~peroxisome organization                                | 3.226052516            | 0.0312         |
| GO:0016476~regulation of embryonic cell shape                     | 3.199168745            | 0.0170         |
| GO:0008152~metabolic process                                      | 2.879877931            | 4.40E-11       |

|                                                         |             |          |
|---------------------------------------------------------|-------------|----------|
| GO:0007158~neuron cell-cell adhesion                    | 2.856400665 | 0.0059   |
| GO:0016042~lipid catabolic process                      | 2.759390831 | 3.92E-04 |
| GO:0016311~dephosphorylation                            | 2.697191448 | 2.01E-04 |
| GO:0055114~oxidation-reduction process                  | 2.684461984 | 2.26E-25 |
| GO:0005975~carbohydrate metabolic process               | 2.673159868 | 6.08E-07 |
| GO:0035317~imaginal disc-derived wing hair organization | 2.665973954 | 0.0404   |
| GO:0050804~modulation of synaptic transmission          | 2.578084703 | 0.0077   |
| GO:0006626~protein targeting to mitochondrion           | 2.521512311 | 0.0332   |
| GO:0006260~DNA replication                              | 2.509151957 | 0.0027   |
| GO:0030261~chromosome condensation                      | 2.437461901 | 0.0393   |
| GO:0006508~proteolysis                                  | 2.386146913 | 3.98E-21 |
| GO:0009306~protein secretion                            | 2.223360518 | 0.0432   |
| GO:0055085~transmembrane transport                      | 2.206323272 | 2.10E-10 |
| GO:0000278~mitotic cell cycle                           | 2.160477594 | 0.0141   |
| GO:0006749~glutathione metabolic process                | 2.139261775 | 0.0282   |
| GO:0006810~transport                                    | 2.022230559 | 0.0010   |
| GO:0040003~chitin-based cuticle development             | 1.954568505 | 2.00E-04 |
| GO:0006030~chitin metabolic process                     | 1.938890148 | 0.0047   |

## Early 2<sup>nd</sup> instar larvae: 2-fold upregulated

| <b>Biological Processes GO Term</b>                                                                  | <b>Fold Enrichment</b> | <b>p-value</b> |
|------------------------------------------------------------------------------------------------------|------------------------|----------------|
| GO:0048499~synaptic vesicle membrane organization                                                    | 10.65503876            | 0.0031         |
| GO:0042256~mature ribosome assembly                                                                  | 10.65503876            | 0.0247         |
| GO:0044246~regulation of multicellular organismal metabolic process                                  | 10.65503876            | 0.0247         |
| GO:1990834~response to odorant                                                                       | 10.65503876            | 0.0247         |
| GO:0007212~dopamine receptor signaling pathway                                                       | 10.65503876            | 0.0247         |
| GO:0097090~presynaptic membrane organization                                                         | 10.65503876            | 0.0247         |
| GO:0099509~regulation of presynaptic cytosolic calcium ion concentration                             | 10.65503876            | 0.0247         |
| GO:0016056~rhodopsin mediated signaling pathway                                                      | 9.323158915            | 1.59E-05       |
| GO:0007004~telomere maintenance via telomerase                                                       | 7.99127907             | 0.0464         |
| GO:0034097~response to cytokine                                                                      | 7.99127907             | 0.0464         |
| GO:0040012~regulation of locomotion                                                                  | 7.99127907             | 0.0464         |
| GO:0048133~male germ-line stem cell asymmetric division                                              | 7.99127907             | 0.0464         |
| GO:0001941~postsynaptic membrane organization                                                        | 7.99127907             | 0.0464         |
| GO:0007296~vitellogenesis                                                                            | 7.99127907             | 0.0464         |
| GO:0006895~Golgi to endosome transport                                                               | 7.99127907             | 0.0464         |
| GO:0048172~regulation of short-term neuronal synaptic plasticity                                     | 7.610741971            | 0.0021         |
| GO:0048790~maintenance of presynaptic active zone structure                                          | 7.103359173            | 6.55E-04       |
| GO:0055065~metal ion homeostasis                                                                     | 7.103359173            | 0.0132         |
| GO:0016200~synaptic target attraction                                                                | 7.103359173            | 0.0132         |
| GO:0014067~negative regulation of phosphatidylinositol 3-kinase signaling                            | 7.103359173            | 0.0132         |
| GO:0048791~calcium ion-regulated exocytosis of neurotransmitter                                      | 6.659399225            | 0.0040         |
| GO:0046928~regulation of neurotransmitter secretion                                                  | 6.556946929            | 6.45E-05       |
| GO:0048489~synaptic vesicle transport                                                                | 6.088593577            | 1.19E-04       |
| GO:0048526~imaginal disc-derived wing expansion                                                      | 6.088593577            | 0.0216         |
| GO:0003012~muscle system process                                                                     | 6.088593577            | 0.0216         |
| GO:0048789~cytoskeletal matrix organization at active zone                                           | 6.088593577            | 0.0216         |
| GO:0016079~synaptic vesicle exocytosis                                                               | 5.771479328            | 4.03E-07       |
| GO:0007271~synaptic transmission, cholinergic                                                        | 5.682687339            | 2.04E-04       |
| GO:0050803~regulation of synapse structure or activity                                               | 5.32751938             | 3.34E-04       |
| GO:0019722~calcium-mediated signaling                                                                | 5.32751938             | 0.0010         |
| GO:0050774~negative regulation of dendrite morphogenesis                                             | 5.32751938             | 0.0102         |
| GO:0010038~response to metal ion                                                                     | 5.32751938             | 0.0321         |
| GO:0007415~defasciculation of motor neuron axon                                                      | 5.32751938             | 0.0321         |
| GO:0016059~deactivation of rhodopsin mediated signaling                                              | 4.972351421            | 0.0016         |
| GO:0035094~response to nicotine                                                                      | 4.917710197            | 0.0049         |
| GO:0007615~anesthesia-resistant memory                                                               | 4.843199436            | 0.0148         |
| GO:1901215~negative regulation of neuron death                                                       | 4.843199436            | 0.0148         |
| GO:0061723~glycophagy                                                                                | 4.843199436            | 0.0148         |
| GO:1900073~regulation of neuromuscular synaptic transmission                                         | 4.843199436            | 0.0148         |
| GO:0043162~ubiquitin-dependent protein catabolic process via the multivesicular body sorting pathway | 4.843199436            | 0.0148         |

|                                                                                        |             |          |
|----------------------------------------------------------------------------------------|-------------|----------|
| GO:0042058~regulation of epidermal growth factor receptor signaling pathway            | 4.843199436 | 0.0148   |
| GO:0044130~negative regulation of growth of symbiont in host                           | 4.735572782 | 0.0449   |
| GO:0043153~entrainment of circadian clock by photoperiod                               | 4.735572782 | 0.0449   |
| GO:0090328~regulation of olfactory learning                                            | 4.735572782 | 0.0449   |
| GO:0007418~ventral midline development                                                 | 4.735572782 | 0.0449   |
| GO:0001963~synaptic transmission, dopaminergic                                         | 4.735572782 | 0.0449   |
| GO:0032509~endosome transport via multivesicular body sorting pathway                  | 4.661579457 | 0.0024   |
| GO:0019731~antibacterial humoral response                                              | 4.632625548 | 1.31E-04 |
| GO:0006963~positive regulation of antibacterial peptide biosynthetic process           | 4.439599483 | 0.0206   |
| GO:0007218~neuropeptide signaling pathway                                              | 4.408981556 | 6.39E-10 |
| GO:0061057~peptidoglycan recognition protein signaling pathway                         | 4.143626184 | 0.0046   |
| GO:0048082~regulation of adult chitin-containing cuticle pigmentation                  | 4.098091831 | 0.0276   |
| GO:0008343~adult feeding behavior                                                      | 4.098091831 | 0.0276   |
| GO:0009612~response to mechanical stimulus                                             | 4.059062385 | 0.0022   |
| GO:0008345~larval locomotory behavior                                                  | 3.805370986 | 7.22E-04 |
| GO:0007465~R7 cell fate commitment                                                     | 3.805370986 | 0.0358   |
| GO:0051124~synaptic growth at neuromuscular junction                                   | 3.729263566 | 4.34E-05 |
| GO:0050808~synapse organization                                                        | 3.674151296 | 6.80E-07 |
| GO:0018990~ecdysis, chitin-based cuticle                                               | 3.551679587 | 0.0106   |
| GO:0032008~positive regulation of TOR signaling                                        | 3.551679587 | 0.0218   |
| GO:0045197~establishment or maintenance of epithelial cell apical/basal polarity       | 3.551679587 | 0.0218   |
| GO:0043052~thermotaxis                                                                 | 3.551679587 | 0.0218   |
| GO:0016082~synaptic vesicle priming                                                    | 3.551679587 | 0.0218   |
| GO:0034605~cellular response to heat                                                   | 3.551679587 | 0.0453   |
| GO:0007413~axonal fasciculation                                                        | 3.551679587 | 0.0453   |
| GO:0007412~axon target recognition                                                     | 3.551679587 | 0.0453   |
| GO:0008355~olfactory learning                                                          | 3.442397138 | 1.08E-06 |
| GO:0007169~transmembrane receptor protein tyrosine kinase signaling pathway            | 3.409612403 | 0.0066   |
| GO:0000045~autophagosome assembly                                                      | 3.409612403 | 0.0066   |
| GO:2000331~regulation of terminal button organization                                  | 3.409612403 | 0.0066   |
| GO:0007274~neuromuscular synaptic transmission                                         | 3.390239605 | 1.41E-06 |
| GO:0000723~telomere maintenance                                                        | 3.390239605 | 0.0135   |
| GO:0048814~regulation of dendrite morphogenesis                                        | 3.364749082 | 0.0274   |
| GO:0061024~membrane organization                                                       | 3.364749082 | 0.0274   |
| GO:0007157~heterophilic cell-cell adhesion via plasma membrane cell adhesion molecules | 3.306736167 | 0.0042   |
| GO:0050965~detection of temperature stimulus involved in sensory perception of pain    | 3.278473465 | 6.66E-04 |
| GO:0007614~short-term memory                                                           | 3.278473465 | 0.0083   |
| GO:0035096~larval midgut cell programmed cell death                                    | 3.278473465 | 0.0084   |
| GO:0007611~learning or memory                                                          | 3.242837883 | 2.16E-04 |
| GO:0006302~double-strand break repair                                                  | 3.242837883 | 0.0168   |
| GO:0007268~chemical synaptic transmission                                              | 3.228799624 | 6.00E-06 |



|                                                                                      |             |          |
|--------------------------------------------------------------------------------------|-------------|----------|
| GO:0006446~regulation of translational initiation                                    | 3.196511628 | 0.0338   |
| GO:0051607~defense response to virus                                                 | 3.157048521 | 0.0104   |
| GO:0019730~antimicrobial humoral response                                            | 3.157048521 | 0.0104   |
| GO:0001666~response to hypoxia                                                       | 3.133834929 | 0.0033   |
| GO:0016322~neuron remodeling                                                         | 3.107719638 | 3.43E-04 |
| GO:0006959~humoral immune response                                                   | 3.107719638 | 0.0207   |
| GO:0001731~formation of translation preinitiation complex                            | 3.107719638 | 0.0207   |
| GO:0007528~neuromuscular junction development                                        | 3.078122308 | 6.71E-04 |
| GO:0000422~mitophagy                                                                 | 3.044296788 | 0.0410   |
| GO:0006914~autophagy                                                                 | 3.015577007 | 2.73E-04 |
| GO:0009617~response to bacterium                                                     | 3.011206606 | 8.31E-04 |
| GO:0042059~negative regulation of epidermal growth factor receptor signaling pathway | 3.005267342 | 0.0026   |
| GO:0070050~neuron cellular homeostasis                                               | 2.983410853 | 0.0251   |
| GO:0007426~tracheal outgrowth, open tracheal system                                  | 2.983410853 | 0.0251   |
| GO:0048675~axon extension                                                            | 2.939321037 | 0.0155   |
| GO:0030536~larval feeding behavior                                                   | 2.905919662 | 0.0492   |
| GO:0030431~sleep                                                                     | 2.882100648 | 5.05E-08 |
| GO:0007269~neurotransmitter secretion                                                | 2.873268879 | 4.98E-06 |
| GO:0007602~phototransduction                                                         | 2.868664281 | 7.93E-04 |
| GO:0007601~visual perception                                                         | 2.854028239 | 5.04E-04 |
| GO:0045887~positive regulation of synaptic growth at neuromuscular junction          | 2.841343669 | 0.0186   |
| GO:0006952~defense response                                                          | 2.820451436 | 0.0116   |
| GO:0007616~long-term memory                                                          | 2.811746339 | 8.38E-05 |
| GO:0007173~epidermal growth factor receptor signaling pathway                        | 2.762417456 | 0.0357   |
| GO:0045475~locomotor rhythm                                                          | 2.66375969  | 6.75E-04 |
| GO:0045793~positive regulation of cell size                                          | 2.66375969  | 0.0261   |
| GO:0007623~circadian rhythm                                                          | 2.577831958 | 0.0015   |
| GO:0048102~autophagic cell death                                                     | 2.577831958 | 0.0015   |
| GO:0016197~endosomal transport                                                       | 2.571905908 | 0.0490   |
| GO:0016318~ommatidial rotation                                                       | 2.571905908 | 0.0490   |
| GO:0007606~sensory perception of chemical stimulus                                   | 2.547944051 | 9.33E-05 |
| GO:0032482~Rab protein signal transduction                                           | 2.507067943 | 0.0355   |
| GO:0048488~synaptic vesicle endocytosis                                              | 2.507067943 | 0.0355   |
| GO:0007166~cell surface receptor signaling pathway                                   | 2.458855098 | 0.0024   |
| GO:0008063~Toll signaling pathway                                                    | 2.435437431 | 0.0410   |
| GO:0048149~behavioral response to ethanol                                            | 2.430096559 | 0.0058   |
| GO:0007155~cell adhesion                                                             | 2.380381    | 3.70E-04 |
| GO:0042594~response to starvation                                                    | 2.367786391 | 0.0050   |
| GO:0045886~negative regulation of synaptic growth at neuromuscular junction          | 2.367786391 | 0.0219   |
| GO:0045087~innate immune response                                                    | 2.356402803 | 2.10E-04 |
| GO:0035071~salivary gland cell autophagic cell death                                 | 2.322252037 | 0.0021   |
| GO:0050830~defense response to Gram-positive bacterium                               | 2.283222591 | 0.0136   |

|                                                                        |             |          |
|------------------------------------------------------------------------|-------------|----------|
| GO:0008593~regulation of Notch signaling pathway                       | 2.283222591 | 0.0388   |
| GO:0042127~regulation of cell proliferation                            | 2.283222591 | 0.0388   |
| GO:0043547~positive regulation of GTPase activity                      | 2.283222591 | 0.0388   |
| GO:0008045~motor neuron axon guidance                                  | 2.260159737 | 0.0075   |
| GO:0006811~ion transport                                               | 2.230124392 | 0.0440   |
| GO:0035556~intracellular signal transduction                           | 2.215404099 | 9.74E-04 |
| GO:0008344~adult locomotory behavior                                   | 2.204490778 | 0.0175   |
| GO:0006897~endocytosis                                                 | 2.198658792 | 0.0130   |
| GO:0007264~small GTPase mediated signal transduction                   | 2.193684451 | 0.0096   |
| GO:0007409~axonogenesis                                                | 2.131007752 | 0.0222   |
| GO:0042060~wound healing                                               | 2.131007752 | 0.0222   |
| GO:0040018~positive regulation of multicellular organism growth        | 2.131007752 | 0.0301   |
| GO:0043087~regulation of GTPase activity                               | 2.131007752 | 0.0407   |
| GO:0007186~G-protein coupled receptor signaling pathway                | 2.086301296 | 3.12E-04 |
| GO:0009408~response to heat                                            | 2.036992704 | 0.0230   |
| GO:0040003~chitin-based cuticle development                            | 1.943371849 | 7.85E-04 |
| GO:0050829~defense response to Gram-negative bacterium                 | 1.87449756  | 0.0113   |
| GO:0016192~vesicle-mediated transport                                  | 1.864631783 | 0.0078   |
| GO:0006979~response to oxidative stress                                | 1.853050219 | 0.0235   |
| GO:0006915~apoptotic process                                           | 1.846873385 | 0.0454   |
| GO:0008360~regulation of cell shape                                    | 1.826578073 | 0.0177   |
| GO:0009267~cellular response to starvation                             | 1.794532844 | 0.0305   |
| GO:0010906~regulation of glucose metabolic process                     | 1.685542855 | 0.0077   |
| GO:0006357~regulation of transcription from RNA polymerase II promoter | 1.601335305 | 0.0191   |
| GO:0008340~determination of adult lifespan                             | 1.566917465 | 0.0274   |
| GO:0055085~transmembrane transport                                     | 1.432919006 | 0.0212   |

**Overlapping: 2-fold downregulated**

| <b>Biological Processes GO Term</b>            | <b>Fold Enrichment</b> | <b>p-value</b> |
|------------------------------------------------|------------------------|----------------|
| GO:0006807~nitrogen compound metabolic process | 30.20879               | 2.75E-04       |
| GO:0005975~carbohydrate metabolic process      | 9.119635               | 2.46E-05       |
| GO:0016311~dephosphorylation                   | 7.923617               | 0.013558       |
| GO:0055114~oxidation-reduction process         | 3.81276                | 1.27E-04       |
| GO:0006508~proteolysis                         | 2.543898               | 0.015464       |

**Overlapping: 2-fold upregulated**

| <b>Biological Processes GO Term</b>                    | <b>Fold Enrichment</b> | <b>p-value</b> |
|--------------------------------------------------------|------------------------|----------------|
| GO:0006959~humoral immune response                     | 42.95313               | 0.002043       |
| GO:0050830~defense response to Gram-positive bacterium | 24.54464               | 5.08E-04       |
| GO:0050829~defense response to Gram-negative bacterium | 9.545139               | 0.036938       |
| GO:0055085~transmembrane transport                     | 4.739655               | 0.047388       |
