# Supplementary material
Source: PubMed Central journal article supplement (PMC6813854)
Supplement: NIHMS1028298-supplement-6.pdf [file NIHMS1028298-supplement-6.pdf]

## Putative H3K9me3 target genes in the early 2<sup>nd</sup> instar downregulated

| <b>Downregulated H3K9me3 target</b>                | <b>Function</b>                                                                                         | <b>Loss-of-function phenotype, or knockdown related to developmental lethality</b>                                       | <b>Reference</b>          |
|----------------------------------------------------|---------------------------------------------------------------------------------------------------------|--------------------------------------------------------------------------------------------------------------------------|---------------------------|
| <i>Calmodulin (Cam)</i>                            | Calcium sensor                                                                                          | 1 <sup>st</sup> instar larval stage lethality                                                                            | Wang et al., 2003         |
| <i>Glycoprotein 93 (Gp93)</i>                      | Heat shock protein chaperones                                                                           | severe growth defect and mid-gut phenotype at each larval stage, with complete death at the 3 <sup>rd</sup> instar stage | Maynard et al., 2010      |
| KCNQ potassium channel (KCNQ)                      | Potassium channel subunit                                                                               | One to two days prolonged development, fewer eclose                                                                      | Ocorr et al., 2007        |
| <i>Eukaryotic initiation factor 4B (eIF-4B)</i>    | Translation initiation factor, protein synthesis                                                        | S2 cell culture RNAi knockdown showed its requirement for cell survival                                                  | Hernández et al., 2004    |
| <i>Minichromosome maintenance 6 (Mcm6)</i>         | Mini-Chromosome Maintenance (MCM) Complex subunit, eukaryotic replicative DNA helicase, DNA replication | Partial lethality, reduced pupal size of escapees.                                                                       | Apger et al., 2010        |
| <i>Minichromosome maintenance 10 (Mcm10)</i>       | Zinc finger domain, DNA replication                                                                     | Lethality prior to adulthood                                                                                             | Schwed et al., 2001       |
| Muscle-specific protein 300 kDa ( <i>Msp-300</i> ) | Nesprin-like protein                                                                                    | Larval lethality, embryonic muscle morphogenesis                                                                         | Technau and Roth, 2008    |
| <i>Neurotrophin 1 (NT1)</i>                        | Cytokine, Toll pathway                                                                                  | Larval partial lethality, with <i>NT2</i> , nervous system development                                                   | Zhu B et al., 2008        |
| <i>Phospholipase D (Pld)</i>                       | Phospholipase enzyme, vesicle trafficking                                                               | Embryonic lethality at cellularization                                                                                   | LaLonde et al., 2006      |
| SET-domain containing 2 ( <i>SET2</i> )            | H3K36me2,3 methyltransferase, dosage compensation                                                       | Larval lethality                                                                                                         | Laschan et al., 2007      |
| Spc105-related ( <i>Spc105</i> )                   | Kinetochore component, assembly and function                                                            | Embryonic lethality                                                                                                      | Schittenhelm et al., 2009 |
| <i>bicoid-interacting protein 3 (bin3)</i>         | RNA methyltransferase                                                                                   | Embryonic lethality in maternal null offspring, severe head involution defects                                           | Cosgrove et al., 2012     |

|                           |                                                                                                     |                                                                                                                              |                                 |
|---------------------------|-----------------------------------------------------------------------------------------------------|------------------------------------------------------------------------------------------------------------------------------|---------------------------------|
| <i>apterous (ap)</i>      | Homeodomain transcription factor                                                                    | Polyphasic lethality, primarily at the larval and pupal stages, juvenile hormone synthesis, dorsal-ventral pattern formation | Shtorch et al., 1995            |
| <i>furrowed (fw)</i>      | Suggested carbohydrate-binding protein                                                              | Allelic differences, lethality of one allele in females in pupal stage                                                       | Leshko-Lindsay and Corces, 1997 |
| <i>scully (scu)</i>       | $\beta$ -oxidation pathway enzyme, germline formation                                               | Allelic differences, lethality in embryonic, third instar and late pupal phases                                              | Torroja et al., 1998            |
| <i>spookier (spok)</i>    | Cytochrome P450 enzyme, ecdysone steroid hormone biosynthesis pathway                               | RNAi knockdown in prothoracic cells result in lethality in the 1 <sup>st</sup> instar stage in most larvae                   | Ono et al., 2006                |
| <i>uninflatable (uif)</i> | transmembrane protein with extracellular domain with carbohydrate binding and cell signaling motifs | Embryonic and 1 <sup>st</sup> instar larval lethality, tracheal inflation and molting defect                                 | Zhang and Ward, 2010.           |
| <i>waterproof (wat)</i>   | Fatty acyl-CoA reductase                                                                            | Embryonic lethal, tracheal tube liquid clearance defect                                                                      | Jaspers et al., 2014.           |
